# Supplementary material for: Influence of tumor microenvironment on prognosis in colorectal cancer: Tissue architecture-dependent signature of endosialin (TEM-1) and associated proteins
Source: PubMed Central journal article supplement (PMC4147300; doi:10.18632/oncotarget.2108), 2014-06-16
Supplement: oncotarget-05-3983-s001.pdf [file oncotarget-05-3983-s001.pdf]

**Influence of Tumor Microenvironment on Prognosis in Colorectal Cancer: Tissue architecture-dependent signature of endosialin (TEM-1) and associated proteins**

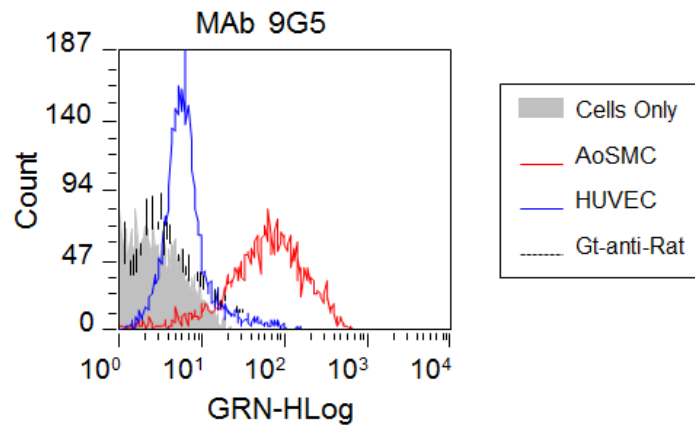

| Histogram # | Geometric Mean |
|-------------|----------------|
| 1           | 2.5            |
| 2           | 57.4           |
| 3           | 6.5            |
| 4           | 3.5            |

**Fig. S1: Fluorescence activated cell sorting using anti-TEM-1 clone 9G5.** Cell sorting was performed on aortic smooth muscle cells (AoSMC) and human umbilical vein endothelial cells (HUVEC). Clone 9G5 (rat IgG1) showed strong positive staining on AoSMC and very weak staining on HUVEC. Second antibody (goat anti-rat IgG) was completely negative.

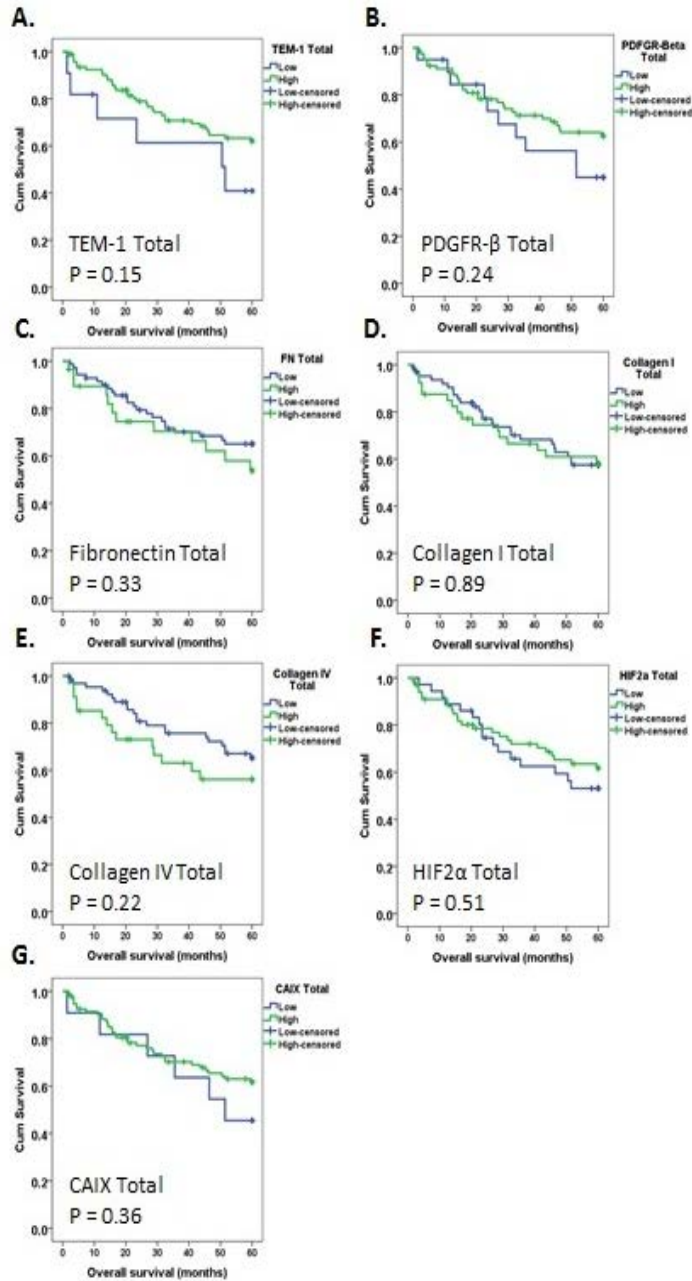

**Fig. S2: Kaplan-Meier survival analysis for total expression of each biomarker.** Kaplan-Meier 5-year disease-specific survival analysis with indicated p-values for all markers (total expression): (A) TEM-1; (B) PDGFR-β; (C) FN; (D) Col I; (E) Col IV, (F) HIF2α; and (G) CAIX. Blue and green lines indicate low and high level expression, respectively. X-marks indicate censored cases. Cut-points were determined based on optimal cut-point analysis.

**Table S1: Summary of Univariate Survival Analysis.** Univariate survival data is presented based on optimal cut-point analysis for each biomarker in each compartment. Provided are the determined optimal cut-points and % of high level expressing cases (% High), p-value for the Training Set (Training P), as well as hazard ratio (HR), 95% confidence intervals (95%CI) and Validation Set p-values (Validation P) based on 5-year disease-specific Cox Proportional Hazards modeling. Markers that are significant individual biomarkers for survival prediction are indicated as italicized bold while markers that were used in multivariate modeling resulting the TAPPS model are indicated in bold.

| Marker                                         | Optimal Cut (% High)         | Training P              | Validation HR (95%CI)          | Validation P        |
|------------------------------------------------|------------------------------|-------------------------|--------------------------------|---------------------|
| TEM-1 Tumor                                    | 618.30 (10.1)                | 0.10                    | 0.99 (0.30-3.21)               | 0.98                |
| <b>TEM-1 Stromal Vessel</b>                    | <b>635.84 (50.7)</b>         | <b>0.12</b>             | <b>0.59 (0.30-1.16)</b>        | <b>0.12</b>         |
| <b>TEM-1 Tumor Vessel</b>                      | <b>364.27 (85.0)</b>         | <b>0.19</b>             | <b>0.47 (0.24-0.94)</b>        | <b>0.03</b>         |
| <i><b>TEM-1 Stroma</b></i>                     | <i><b>473.58 (65.2)</b></i>  | <i><b>0.012</b></i>     | <i><b>0.49 (0.26-0.94)</b></i> | <i><b>0.03</b></i>  |
| PDGFR- $\beta$ Tumor                           | 1407.43 (13.1)               | 0.007                   | 0.37 (0.10-1.56)               | 0.16                |
| <b>PDGFR-<math>\beta</math> Stromal Vessel</b> | <b>3803.74 (25.2)</b>        | <b>0.12</b>             | <b>1.86 (0.92-3.76)</b>        | <b>0.08</b>         |
| PDGFR- $\beta$ Tumor Vessel                    | 1060.14 (20.9)               | 0.005                   | 0.93 (0.41-2.12)               | 0.86                |
| PDGFR- $\beta$ Stroma                          | 6438.14 (15.1)               | 0.007                   | 0.87 (0.33-2.60)               | 0.87                |
| <b>Collagen I Tumor</b>                        | <b>853.82 (49.6)</b>         | <b>0.001</b>            | <b>1.61 (0.86-3.02)</b>        | <b>0.13</b>         |
| <i><b>Collagen I Stromal Vessel</b></i>        | <i><b>2587.16 (25.2)</b></i> | <i><b>&lt;0.001</b></i> | <i><b>2.31 (1.22-4.35)</b></i> | <i><b>0.008</b></i> |
| Collagen I Tumor Vessel                        | 1653.24 (24.0)               | <0.001                  | 1.33 (0.65-2.72)               | 0.43                |
| Collagen I Stroma                              | 3285.71 (28.8)               | 0.001                   | 1.36 (0.72-2.56)               | 0.34                |
| <b>Collagen IV Tumor</b>                       | <b>467.87 (45.7)</b>         | <b>&lt;0.001</b>        | <b>1.59 (0.84-3.01)</b>        | <b>0.15</b>         |
| Collagen IV Stromal Vessel                     | 1832.17 (31.7)               | 0.005                   | 1.28 (0.62-2.63)               | 0.51                |
| Collagen IV Tumor Vessel                       | 608.21 (48.9)                | 0.004                   | 1.31 (0.69-2.48)               | 0.41                |
| Collagen IV Stroma                             | 2602.54 (14.0)               | 0.002                   | 1.26 (0.49-3.22)               | 0.63                |
| FN Tumor                                       | 5156.43 (52.3)               | 0.002                   | 1.50 (0.77-2.92)               | 0.23                |

|                                                      |                              |                     |                                |                    |
|------------------------------------------------------|------------------------------|---------------------|--------------------------------|--------------------|
| FN Stroma Vessel                                     | 5239.83 (55.8)               | 0.02                | 1.28 (0.65-2.53)               | 0.47               |
| <b>FN Tumor Vessel</b>                               | <b>6119.94 (33.5)</b>        | <b>0.004</b>        | <b>1.82 (0.89-3.72)</b>        | <b>0.10</b>        |
| <b>FN Stroma</b>                                     | <b>10380.35 (12.2)</b>       | <b>&lt;0.001</b>    | <b>2.03 (0.72-5.75)</b>        | <b>0.17</b>        |
| HIF2 $\alpha$ Tumor                                  | 1738.02 (31.8)               | 0.05                | 0.76 (0.35-1.66)               | 0.49               |
| <b><i>HIF2<math>\alpha</math> Stromal Vessel</i></b> | <b><i>1881.86 (26.1)</i></b> | <b><i>0.008</i></b> | <b><i>0.33 (0.13-0.86)</i></b> | <b><i>0.02</i></b> |
| <b>HIF2<math>\alpha</math> Tumor Vessel</b>          | <b>1054.97 (65.4)</b>        | <b>0.20</b>         | <b>0.61 (0.33-1.14)</b>        | <b>0.12</b>        |
| HIF2 $\alpha$ Stroma                                 | 2005.59 (61.6)               | 0.08                | 0.86 (0.45-1.64)               | 0.65               |
| CAIX Tumor                                           | 598.58 (88.4)                | 0.02                | 1.20 (0.37-3.90)               | 0.76               |
| CAIX Stroma Vessel                                   | 2214.02 (13.4)               | 0.01                | 0.89 (0.23-3.12)               | 0.62               |
| <b>CAIX Tumor Vessel</b>                             | <b>2641.25 (21.8)</b>        | <b>0.002</b>        | <b>0.52 (0.23-1.19)</b>        | <b>0.16</b>        |
| CAIX Stroma                                          | 2637.22 (15.7)               | 0.04                | 0.84 (0.37-1.91)               | 0.69               |

**Table S2: Key antibody reagents.** Provided is a list of key antibody reagents employed in this study with vendor, species, clone and final concentration provided.

| Type        | Name                 | Vendor            | Species | Clone      | Final Conc. |
|-------------|----------------------|-------------------|---------|------------|-------------|
| Target      | TEM-1                | Morphotek         | Rat     | 9G5        | 1.04 µg/ml  |
|             | PDGFRβ               | Cell Signaling    | Rabbit  | 28E1       | 0.4 µg/ml   |
|             | Fibronectin-1        | Abcam             | Rabbit  | Polyclonal | 0.108 µg/ml |
|             | Collagen I           | Fitzgerald        | Rabbit  | Polyclonal | 0.33 µg/ml  |
|             | Collagen IV          | Fitzgerald        | Rabbit  | Polyclonal | 0.33 µg/ml  |
|             | HIF2α                | Novus Biologicals | Mouse   | Ep190b     | 1.0 µg/ml   |
|             | CAIX                 | Morphotek         | Rat     | 165F3      | 4.6 µg/ml   |
| Compartment | Alexa488-Cytokeratin | eBioscience       | Mouse   | AE1/AE3    | 5 µg/ml     |
|             | Vimentin             | Millipore         | Chicken | Polyclonal | 1:200 Serum |
|             | CD31                 | DAKO              | Mouse   | JC70A      | 6.83 µg/ml  |
|             | CD31                 | Abcam             | Rabbit  | EPR3094    | 0.66 µg/ml  |
| Secondary   | Immpress Anti-Rat    | Vector Labs       | Horse   | Polyclonal | Neat*       |
|             | Immpress Anti-Rabbit | Vector Labs       | Horse   | Polyclonal | Neat*       |
|             | Immpress Anti-Mouse  | Vector Labs       | Horse   | Polyclonal | Neat*       |
|             | Mouse Envision Plus  | DAKO              | Goat    | Polyclonal | Neat*       |

|  |                              |            |      |            |       |
|--|------------------------------|------------|------|------------|-------|
|  | Rabbit Envision Plus         | DAKO       | Goat | Polyclonal | Neat* |
|  | Alexa Fluor 555 anti-chicken | Invitrogen | Goat | Polyclonal | 1:200 |
|  | Alexa Fluor 750 Streptavidin | Invitrogen | Goat | Polyclonal | 1:200 |

\* As supplied by manufacturer

**Table S3: TEM-1 assay precision analysis.** Summary of day-to-day TEM-1 assay reproducibility with indicated Pearson's R correlations, slope, and % coefficient of variation (%CV).

| Comparison     | Pearson's R | Slope | %CV  |
|----------------|-------------|-------|------|
| Day 1 v. Day 2 | 0.973       | 0.999 | 4.12 |
| Day 1 v. Day 3 | 0.950       | 0.997 |      |
| Day 2 v. Day 3 | 0.959       | 0.998 |      |
